# Supplementary material for: Design and development of 3D hierarchical ultra-microporous CO2-sieving carbon architectures for potential flow-through CO2 capture at typical practical flue gas temperatures
Source: Royal Society of Chemistry journal article supplement (doi:10.1039/d0ta01417f), 2020-01-01
Supplement: d0ta01417f1.pdf [file d0ta01417f1.pdf]

## Supplementary material

### **Design and development of 3D hierarchical ultra-microporous CO<sub>2</sub>-sieving carbon architectures for potential flow-through CO<sub>2</sub> capture at typical practical flue gas temperatures**

Xin Liu<sup>a</sup>, Jingjing Liu<sup>a</sup>, Chenggong Sun<sup>a\*</sup>, Hao Liu<sup>a</sup>, Wenlong Wang<sup>b</sup>, Emily Smith<sup>c</sup>, Long Jiang<sup>d</sup>, Xinyong Chen<sup>d</sup>, Colin Snape<sup>a</sup>

<sup>a</sup> *Faculty of Engineering, University of Nottingham, Nottingham NG7 2RD, UK*

<sup>b</sup> *School of Energy and Power Engineering, Shandong University, Jinan, P. R. China*

<sup>c</sup> *School of Chemistry, University of Nottingham, Nottingham NG7 2RD, UK*

<sup>d</sup> *School of Pharmacy, University of Nottingham, Nottingham NG7 2RD, UK*

\*Corresponding authors: [cheng-gong.sun@nottingham.ac.uk](mailto:cheng-gong.sun@nottingham.ac.uk)

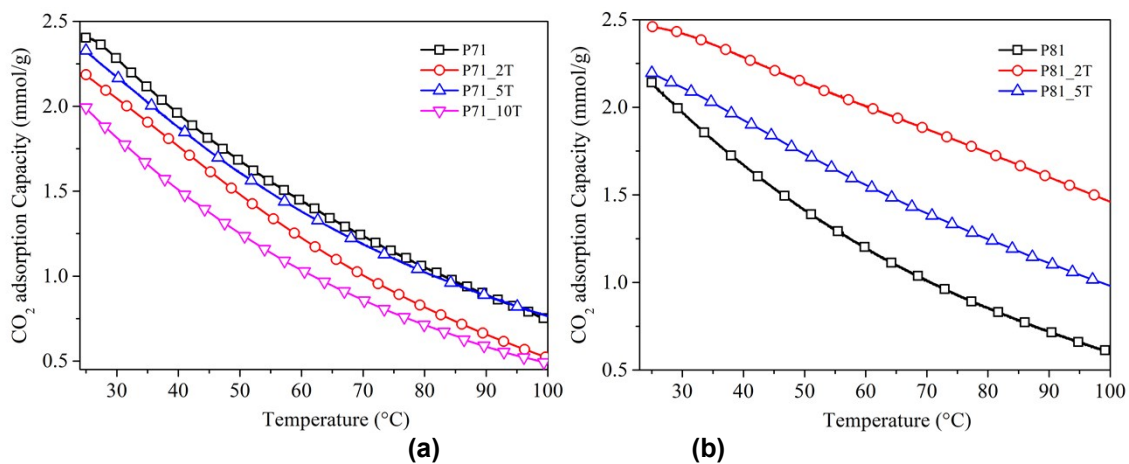

**Figure S1 CO<sub>2</sub> adsorption profiles: the change of CO<sub>2</sub> adsorption capacity of PIR carbons with increasing adsorption temperature in simulated flue gas condition (15% CO<sub>2</sub> + 85% N<sub>2</sub>): (a) activation temperature 700 °C; (b) activation temperature 800 °C**

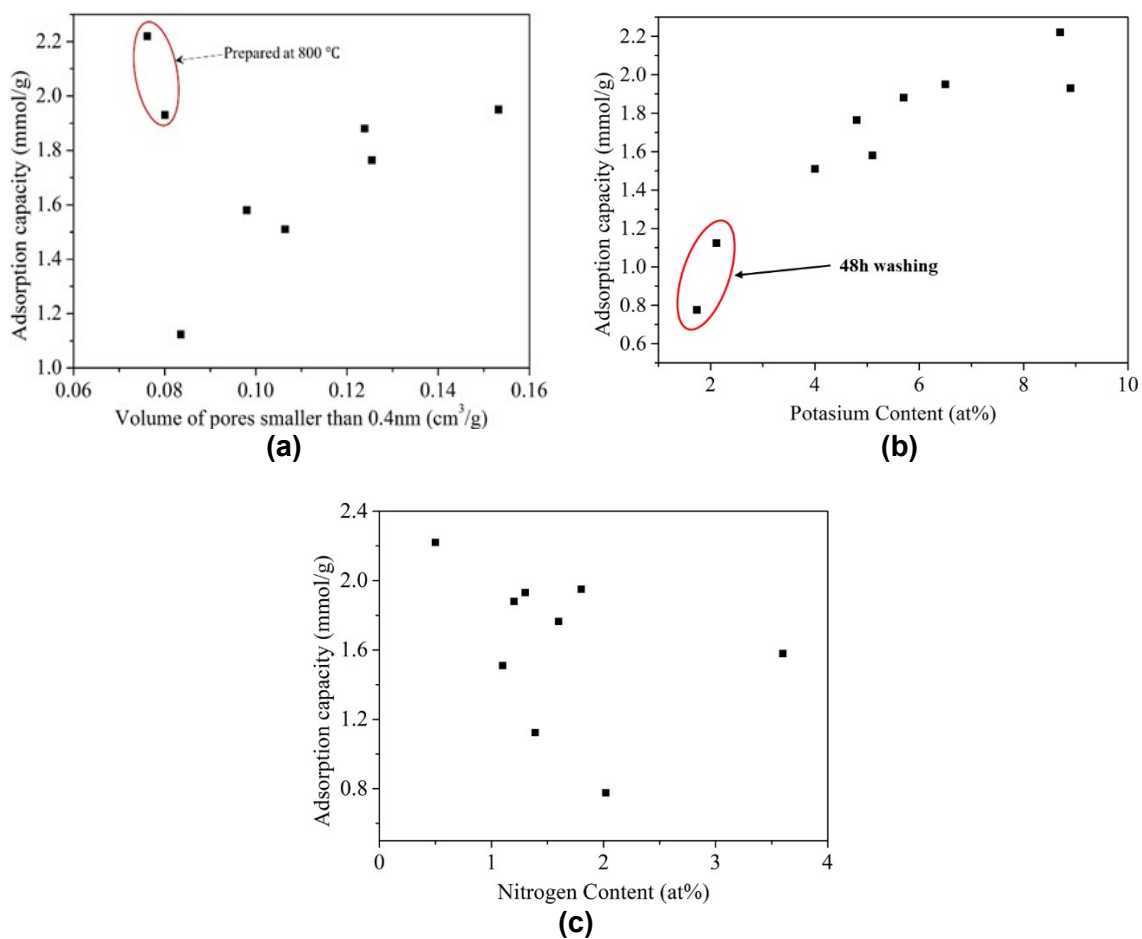

**Figure S2** The underlying role of surface chemistry and porous structures of the PIR carbons in CO<sub>2</sub> adsorption: (a) relation between the ultra-micropore volumes and CO<sub>2</sub> capacity; (b) relation between CO<sub>2</sub> uptake and the content of intercalated potassium in the carbons; (c) relation between CO<sub>2</sub> uptake and the content of nitrogen in the carbons

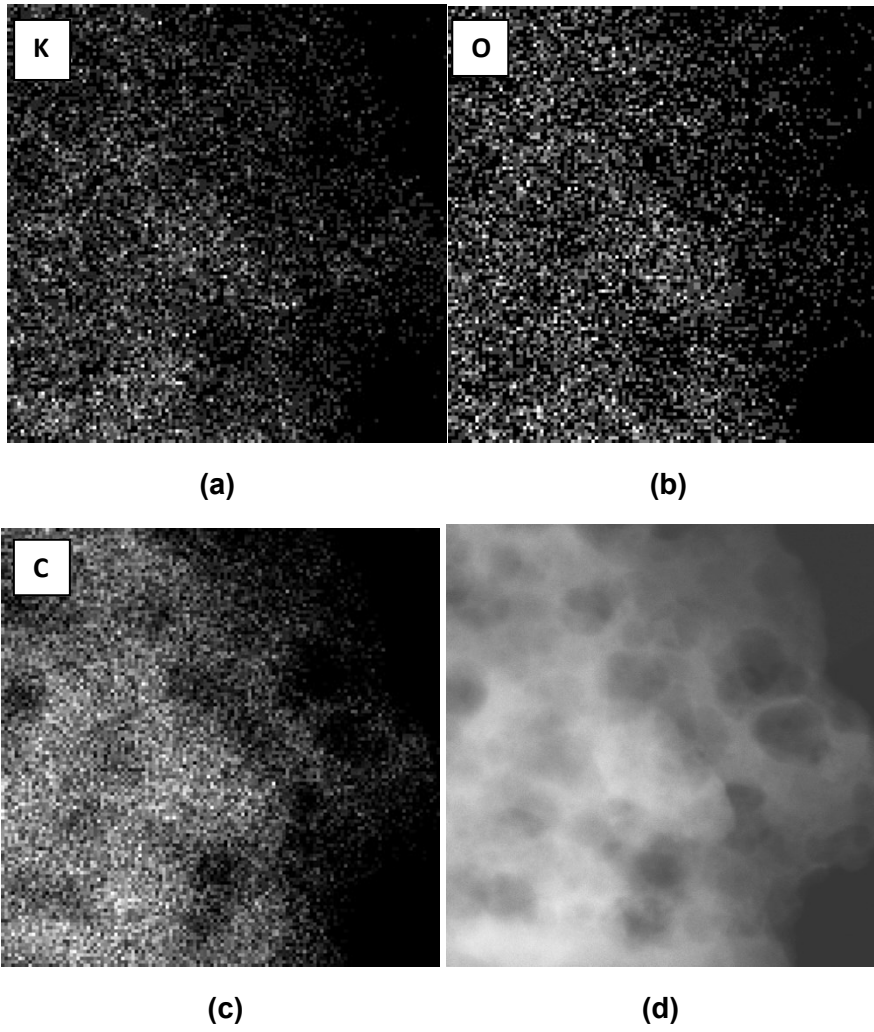

**Figure S3** Elemental mapping of sample P71\_2T: (a) potassium; (b) oxygen; (c) carbon; (d) image of scanning area

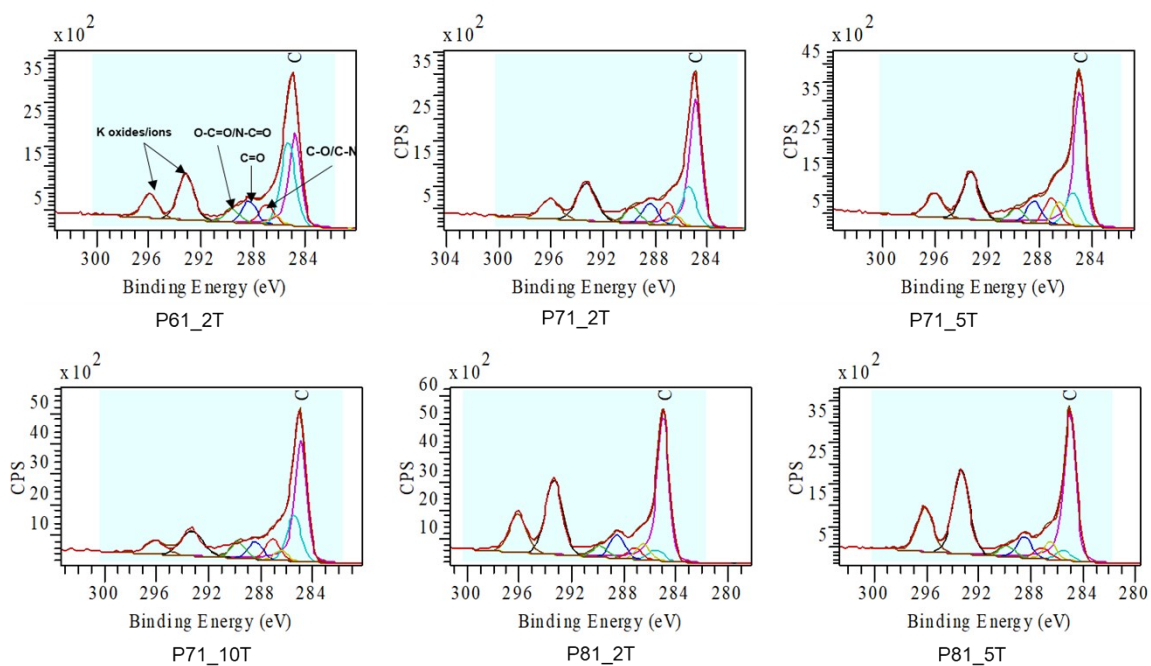

(a)

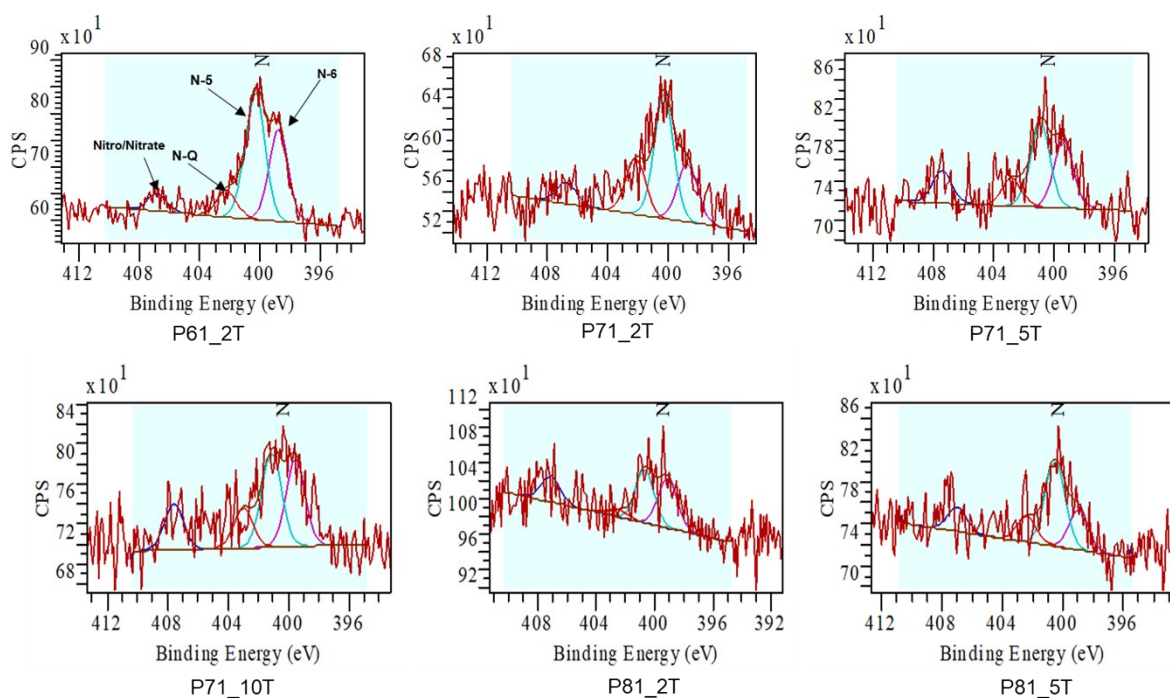

(b)

Figure S4 XPS spectra of the PIR carbons (a) C1s (b) N1s

Table S1 CO<sub>2</sub> adsorption capacity of activated carbon materials at 0.15 bar CO<sub>2</sub>

| Precursors                                              | N<br>(wt%) | Adsorption capacity at 0.15<br>bar |       |       | Ref |
|---------------------------------------------------------|------------|------------------------------------|-------|-------|-----|
|                                                         |            | 25-30 °C                           | 40 °C | 50 °C |     |
| Phenolic resin                                          | 0          | 1.50                               | --    | 0.80  | S1  |
| Graphene                                                | 0          | 0.50                               | --    | 0.32  | S2  |
| Lignin                                                  | 0          | 1.20                               | --    | 0.50  | S3  |
| Starbon                                                 | 0          | 0.93                               | --    | 0.64  | S4  |
| Epoxy resin                                             | 0          | 0.66                               | --    | 0.50  | S5  |
| Polyvinylidene fluoride                                 | 0          | 1.25                               | --    | 0.68  | S6  |
| Sawdust derived carbon                                  | 0          | 1.20                               | --    | 0.50  | S7  |
| Lignocellulosic feedstock                               | 0          | 1.20                               | --    | 0.75  | S8  |
| mango fruit( <i>Mangifera indica</i> L.)<br>seed shells | 0          | 1.13                               | --    | 0.7   | S9  |
| N-enriched carbon monoliths                             | 3.38       | 1.51                               | --    | 1.00  | S10 |
| Chitosan                                                | 4.59       | 1.10                               | --    | 0.65  | S11 |
| Indole-3-butyric acid potassium                         | 4.98       | 1.23                               | --    | 0.66  | S12 |
| urea-formaldehyde resin                                 | 5.00       | 1.20                               | --    | 0.50  | S13 |
| Polypyrrole                                             | 5.80       | 1.70                               | --    | 1.00  | S14 |
| IRMOF-3                                                 | 7.00       | 0.95                               | --    | 0.45  | S15 |
| Polypyrrole                                             | 10.14      | 0.92                               | --    | 0.50  | S16 |
| p-diaminobenzene                                        | 12.91      | 1.43                               | --    | 0.75  | S17 |
| Benzimidazole                                           | 17.60      | 2.03                               | --    | 1.00  | S18 |
| om-ph-MR                                                | 18.16      | 0.80                               | --    | 0.45  | S19 |
| ZIF-8                                                   | 25.52      | 1.45                               | --    | 0.80  | S20 |
| Urea formaldehyde resin                                 | 26.27      | 0.73                               | --    | 0.52  | S21 |
| urea formaldehyde resin                                 | 5.62       | 1.40                               | --    | 1.00  | S22 |
| Activated carbon                                        | 0          | 0.55                               | 0.43  | 0.39  | S23 |
| Starch                                                  | 0          | 0.55                               | 0.34  | --    | S24 |
| Phenolic resin                                          | 0          | 1.34                               | --    | --    | S25 |
| PVDC-methyl acrylate                                    | 0          | 1.16                               | 0.66  | --    | S26 |
| mangosteen peel waste                                   | 0          | 2.00                               | 1.00  | --    | S27 |
| N-doped Pitch                                           | 5.28       | 1.10                               | 0.70  | --    | S28 |
| Benzimidazole-Linked Polymer                            | 7.88       | 2.10                               | 1.40  | --    | S29 |
| Dicyandiamide and F127                                  | 13.10      | 0.98                               | 0.66  | --    | S30 |
| Melamine-formaldehyde resin                             | 27.20      | 1.50                               | 1.10  | --    | S31 |
| Olive stones                                            | 0.20       |                                    | 0.65  | --    | S32 |
| Graphene oxide                                          | 0          | 0.60                               |       |       | S33 |
| Carbon-rGO                                              | 0          | 1.00                               |       |       | S34 |
| Graphene                                                | 0          | 1.07                               |       |       | S35 |
| Graphene                                                | 0          | 0.85                               |       |       | S36 |
| Tar pitch and coal powder                               | 0          | 1.27                               |       |       | S37 |
| Petroleum pitch                                         | 0          | 0.90                               |       |       | S38 |
| Waste Coca Cola R                                       | 0          | 1.36                               |       |       | S39 |
| Sucrose                                                 | 0          | 0.84                               |       |       | S40 |
| Chestnut tannin                                         | 0          | 0.93                               |       |       | S41 |
| Celtuce leaves                                          | 0          | 0.95                               |       |       | S42 |
| Phenolic resin                                          | 0          | 0.80                               |       |       | S43 |

| Precursors                                     | N<br>(wt%) | Adsorption capacity at 0.15<br>bar |       |       | Ref |
|------------------------------------------------|------------|------------------------------------|-------|-------|-----|
|                                                |            | 25-30 °C                           | 40 °C | 50 °C |     |
| Phenolic resin                                 | 0          | 1.25                               |       |       | S44 |
| Microporous organic polymers<br>MOP8-MOP10     | 0          | 0.50                               |       |       | S45 |
| Phenolic resin                                 | 0          | 0.43                               |       |       | S46 |
| ion exchange resin                             | 0          | 0.90                               |       |       | S47 |
| Reduced graphene oxide/poly-<br>thiophene      | 0          | 1.32                               |       |       | S48 |
| Phenolic resin                                 | 0          | 0.70                               |       |       | S49 |
| Phenolic resin/carbon nanotubes                | 0          | 1.18                               |       |       | S50 |
| Glucose                                        | 0          | 0.82                               |       |       | S51 |
| Dicyandiamide/glucose or<br>melamine/glucose   | 0          | 1.60                               |       |       | S52 |
| Coconut shell                                  | 0          | 1.34                               |       |       | S53 |
| Potassium hydrogen phthalate<br>derived carbon | 0          | 1.60                               |       |       | S54 |
| Jujun grass derived carbon                     | 0          | 1.50                               |       |       | S55 |
| Granular Bamboo-Derived<br>Activated Carbon    | 0          | 1.30                               |       |       | S56 |
| Phenolic resin spheres (CS-8)                  | 0          | 1.30                               |       |       | S57 |
| Waste coffee ground derived<br>carbons         | 0          | 1.20                               |       |       | S58 |
| Carboxylic phenolic resins                     | 0          | 1.10                               |       |       | S59 |
| cellulose fibers                               | 0          | 0.90                               |       |       | S60 |
| Cross-linked microporouscarbon<br>beads        | 0          | 1.35                               |       |       | S61 |
| polythiophene                                  | 0          | 0.94                               |       |       | S62 |
| Sucrose                                        | 0          | 1.00                               |       |       | S63 |
| lotus stem waste                               | 0          | 1.05                               |       |       | S64 |
| acrylic acid + glucose                         | 0          | 1.33                               |       |       | S65 |
| d carbon black                                 | 0          | 1.50                               |       |       | S66 |
| Coffee                                         | 0          | 1.10                               |       |       | S67 |
| coconut shell                                  | 0          | 0.99                               |       |       | S68 |
| Benzidine                                      | 0          | 1.00                               |       |       | S69 |
| Vine shoots                                    | 0          | 1.35                               |       |       | S70 |
| Coconut shell derived carbon                   | 0.20       | 1.40                               |       |       | S71 |
| Bean dreg derived carbon                       | 0.28       | 1.40                               |       |       | S72 |
| Pine cone                                      | 0.50       | 1.64                               |       |       | S73 |
| Coconut shell                                  | 0.91       | 1.45                               |       |       | S74 |
| MOF-5                                          | 0.94       | 0.75                               |       |       | S75 |
| Pitch-Based Carbon Spheres                     | 1.10       | 1.86                               |       |       | S76 |
| d-glucose and aniline                          | 1.20       | 1.10                               |       |       | S77 |
| Phenolic resin                                 | 1.51       | 1.36                               |       |       | S78 |
| Nitrogen-containing carbon spheres             | 1.60       | 1.48                               |       |       | S79 |
| Popcorn                                        | 1.62       | 1.20                               |       |       | S80 |
| Urea and petroleum coke                        | 1.64       | 1.27                               |       |       | S81 |
| Imine-linked polymer                           | 1.73       | 1.07                               |       |       | S82 |
| Phenolic resin                                 | 1.92       | 1.30                               |       |       | S83 |

| Precursors                                                              | N<br>(wt%) | Adsorption capacity at 0.15<br>bar |       |       | Ref  |
|-------------------------------------------------------------------------|------------|------------------------------------|-------|-------|------|
|                                                                         |            | 25-30 °C                           | 40 °C | 50 °C |      |
| Nitrogen-Doped Porous Carbon<br>Monolith                                | 1.92       | 1.27                               |       |       | S84  |
| Poly(ammonium-4-<br>Styrenesulfonate)                                   | 2.08       | 0.84                               |       |       | S85  |
| Carboxymethylcellulose<br>melamine and 4,4'-<br>Biphenyldicarbalddehyde | 2.23       | 0.98                               |       |       | S86  |
| Phenolic Resin                                                          | 2.30       | 1.70                               |       |       | S87  |
| Phenolic Resin                                                          | 2.33       | 1.30                               |       |       | S88  |
| Polycarbazole                                                           | 2.99       | 1.55                               |       |       | S89  |
| Biomass derived carbon                                                  | 3.00       | 1.20                               |       |       | S90  |
| Chitosan                                                                | 3.23       | 1.58                               |       |       | S91  |
| microalgae-NaAlg                                                        | 3.34       | 1.25                               |       |       | S92  |
| Polymer NUT-2                                                           | 3.50       | 1.39                               |       |       | S93  |
| Phenolic resin                                                          | 3.55       | 1.36                               |       |       | S94  |
| Meta-aminophenol-formaldehyde<br>resin                                  | 3.80       | 1.67                               |       |       | S95  |
| Poplar anthers derived carbon                                           | 3.81       | 1.40                               |       |       | S96  |
| Banana peel                                                             | 4.20       | 1.27                               |       |       | S97  |
| Cetylpyridinium bromide                                                 | 4.20       | 0.45                               |       |       | S98  |
| N-doped porous carbons                                                  | 4.32       | 1.80                               |       |       | S99  |
| 1,3,5-THB and nitrobenzene                                              | 4.61       | 1.35                               |       |       | S100 |
| N-doped carbons                                                         | 4.70       | 1.00                               |       |       | S101 |
| Polypyrrole functionalized<br>graphene sheets                           | 4.80       | 1.50                               |       |       | S102 |
| water chestnut and melamine                                             | 4.89       | 1.90                               |       |       | S103 |
| Polyimine                                                               | 5.05       | 0.84                               |       |       | S104 |
| Polybenzoxazine derived carbon                                          | 5.25       | 1.77                               |       |       | S105 |
| phenolic resin                                                          | 5.36       | 1.35                               |       |       | S106 |
| Polybenzoxazine resins                                                  | 5.60       | 0.86                               |       |       | S107 |
| N-doped carbon nanotube                                                 | 5.90       | 1.00                               |       |       | S108 |
| Polyacrylonitrile                                                       | 6.10       | 1.20                               |       |       | S109 |
| Procambarus Clarkii Shells                                              | 6.38       | 1.40                               |       |       | S110 |
| Chitosan                                                                | 6.80       | 1.86                               |       |       | S111 |
| Polyindole                                                              | 6.87       | 1.57                               |       |       | S112 |
| Polyurethane foam                                                       | 6.92       | 1.25                               |       |       | S113 |
| Nanostructured templated carbon                                         | 7.00       | 1.48                               |       |       | S114 |
| Lignin                                                                  | 7.10       | 1.55                               |       |       | S115 |
| Ammonia modified biomass carbon                                         | 7.21       | 1.59                               |       |       | S116 |
| N-doped Coal Tar Pitch                                                  | 7.70       | 1.45                               |       |       | S117 |
| Polycarbazol                                                            | 8.06       | 0.84                               |       |       | S118 |
| Sucrose/urea based carbon                                               | 8.90       | 1.55                               |       |       | S119 |
| Polymer/ionic liquid                                                    | 9.20       | 0.89                               |       |       | S120 |
| Wheat flour                                                             | 10.00      | 1.45                               |       |       | S121 |
| pigskin collagen                                                        | 10.40      | 1.27                               |       |       | S122 |
| p-diaminobenzene derived carbon                                         | 10.50      | 1.80                               |       |       | S123 |
| Corncob                                                                 | 11.52      | 1.23                               |       |       | S124 |
| Melamine-doped phenolic resin                                           | 11.80      | 1.15                               |       |       | S125 |



| Precursors                                  | N<br>(wt%) | Adsorption capacity at 0.15<br>bar |       |       | Ref  |
|---------------------------------------------|------------|------------------------------------|-------|-------|------|
|                                             |            | 25-30 °C                           | 40 °C | 50 °C |      |
| D-glucose and urea                          | 12.27      | 1.30                               |       |       | S126 |
| Hexamethoxymethylmelamine resin             | 13.60      | 0.55                               |       |       | S127 |
| argan fruit shells                          | 13.90      | 1.50                               |       |       | S128 |
| Hexamethoxymethylmelamine resin             | 14.11      | 0.68                               |       |       | S129 |
| Pyrazole                                    | 15.30      | 2.05                               |       |       | S130 |
| Polyacrylonitrile                           | 16.48      | 1.15                               |       |       | S131 |
| dopamine-melamine                           | 20.90      | 1.60                               |       |       | S132 |
| 1,3-bis(cynomethyl imidazolium)<br>chloride | 22.30      | 1.70                               |       |       | S133 |
| Nitrogen-rich porous polymer                | 28.00      | 1.36                               |       |       | S134 |
| ZIF-8 derived carbon                        | --         | 1.40                               |       |       | S135 |

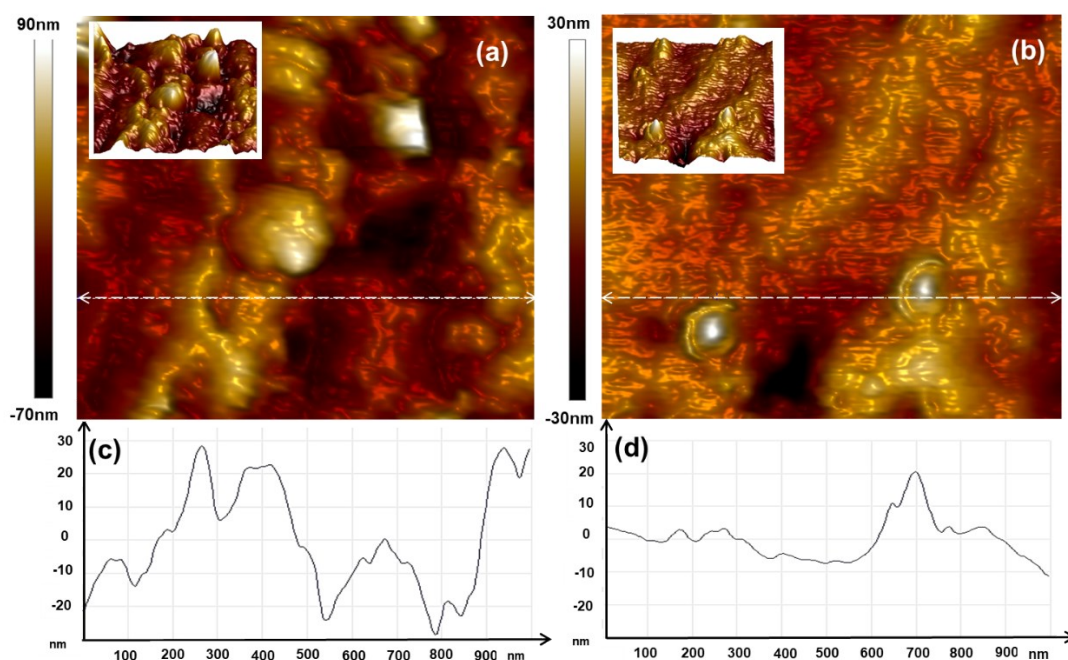

**Figure S5 KPFM 3D topography image and the variation of height along the selected horizontal line: (a) (c) P81\_2T; (b) (d) P81\_2T\_48H**

Table S2 the average surface potential of the selected carbon samples

| Sample     | Test area | Scan size       | Potential (mV) | Roughness ( $R_q$ ) (mV) | Mean (mV)         |
|------------|-----------|-----------------|----------------|--------------------------|-------------------|
| P81_2T     | 1         | 1 $\mu\text{m}$ | -611.3         | 8.0                      | -589.5 $\pm$ 26.0 |
|            | 2         | 1 $\mu\text{m}$ | -559.6         | 20.4                     |                   |
|            | 3         | 1 $\mu\text{m}$ | -597.6         | 11.2                     |                   |
| P81_2T_48H | 1         | 1 $\mu\text{m}$ | -784.8         | 8.7                      | -742.6 $\pm$ 49.0 |
|            | 2         | 1 $\mu\text{m}$ | -688.9         | 10.0                     |                   |
|            | 3         | 1 $\mu\text{m}$ | -754.2         | 8.1                      |                   |

KPFM could provide the contact potential difference (CPD) induced by the difference in the surface potential between the tip and the carbon surface ( $\Phi_{\text{sample}} - \Phi_{\text{tip}}$ ). The 3D surface topography and the surface potential of selected carbons within a scanning area of 1  $\mu\text{m}$  x 1  $\mu\text{m}$  were shown in Figure S4 and Table S2. It can be found that the local CPD distribution was uniform within the scanning area, which in average was -589.5 $\pm$ 26 mV and -742.6 $\pm$ 49 mV for P81\_2T and P81\_2T\_48H, respectively. The line profile of topography (Figure S4) and CPD (Figure 7) showed that the CPD distribution is independent of topographic variations. For instance, the line profile of P81\_2T\_48H exhibited a topographic variation about 30 nm but the variation of CPD distribution was within 20 mV, accounting for about 3% of the measured CPD. It is noteworthy that a clear contrast of 153 $\pm$ 20 mV was observed between the CPD of P81\_2T and P81\_2T\_48H. Because same tip and experimental setup were used to test both samples, the observed CPD contrast is independent of the properties of the tip, we therefore concluded that it must stem from the actual difference in the electronic surface potential between two samples.

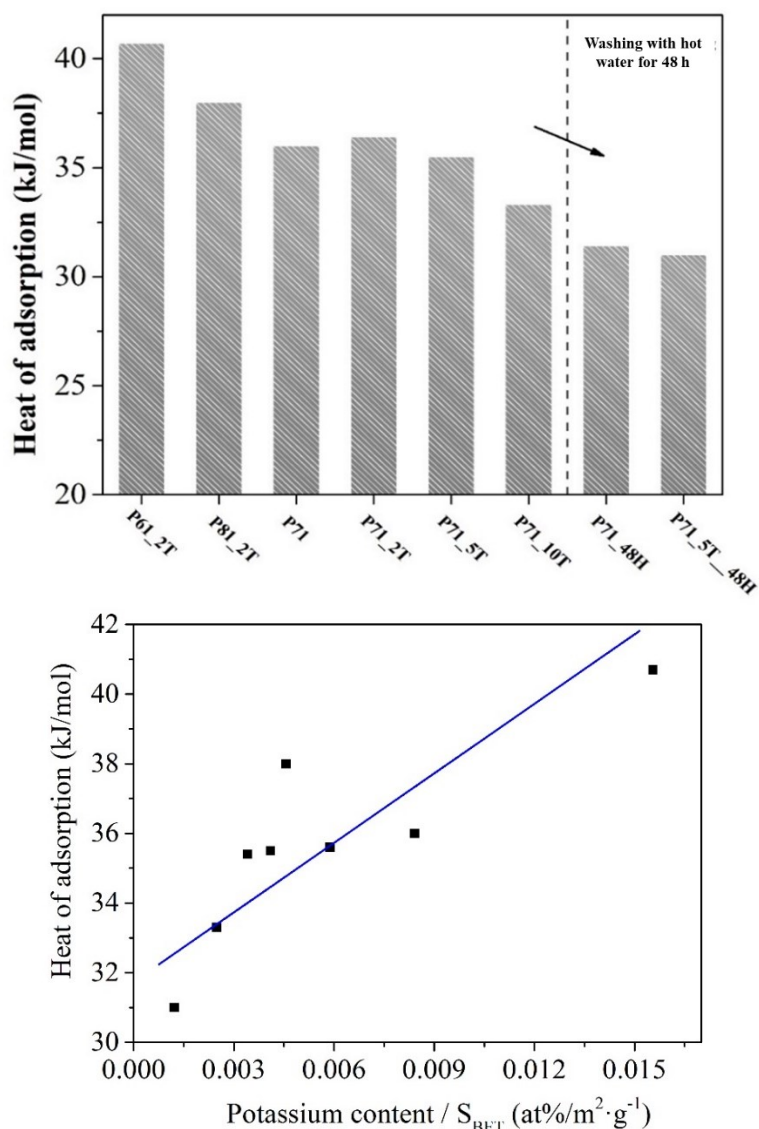

**Figure S6 Heat of adsorption of PIR carbons at 40 °C in 15% CO<sub>2</sub>/N<sub>2</sub> and its relationship with the density of intercalated potassium in the carbons**

## References

- S1 J. Ludwinowicz and M. Jaroniec, *Carbon*, 2015, **82**, 297–303.  
 S2 S. Chowdhury and R. Balasubramanian, *Sci. Rep.*, 2016, **6**, 21537–21546.  
 S3 W. Hao, F. Björnerbäck, Y. Trushkina, M. Oregui Bengoechea, G. Salazar-Alvarez, T. Barth and N. Hedin, *ACS Sustain. Chem. Eng.*, 2017, **5**, 3087–3095.  
 S4 G. Durá, V.L. Budarin, J.A. Castro-Osma, P.S. Shuttleworth, S.C. Quek, J.H. Clark and M. North, *Angew. Chem. Int. Ed.*, 2016, **55**, 9173–9177.  
 S5 D. Tiwari, C. Goel, H. Bhunia and P.K. Bajpai, *RSC Adv.*, 2016, **6**, 97728–97738.  
 S6 S.M. Hong, G. Lim, S.H. Kim, J.H. Kim, K.B. Lee and H.C. Ham, *Microporous Mesoporous Mater.*, 2016, **219**, 59–65  
 S7 M. Sevilla and A. B. Fuertes, *Energy Environ. Sci.*, 2011, **4**, 1765–1771.  
 S8 G. K. Parshetti, S. Chowdhury and R. Balasubramanian, *Fuel*, 2015, **148**, 246–254.  
 S9 L. B. Correia, R. A. Fiuza, R. C. de Andrade and H. M. Andrade, *J. Therm. Anal. Calorim.*, 2018, **131**, 579–586.  
 S10 X. Ma, Y. Li, M. Cao, C. Hu, *J. Mater. Chem. A*, 2014, **2**, 4819–4826.  
 S11 X. Fan, L. Zhang, G. Zhang, Z. Shu and J. Shi, *Carbon*, 2013, **61**, 423–430.

- S12 S. Deng, T. Chen, T. Zhao, X. Yao, B. Wang, J. Huang, Y. Wang and G. Yu, *Chem. Eng. J.*, 2016, **286**, 98–105.
- S13 D. Tiwari, H. Bhunia and P. K. Bajpai, *J. Environ. Manage.*, 2018, **218**, 579–592.
- S14 J.W. To, J. He, J. Mei, R. Haghpanah, Z. Chen, T. Kurosawa, S. Chen, W.G. Bae, L. Pan, J.B.H. Tok and J. Wilcox, *J. Am. Chem. Soc.*, 2016, **138**, 1001–1009
- S15 S. Ding, Q. Dong, J. Hu, W. Xiao, X. Liu, L. Liao and N. Zhang, *Chem. Commun.* 2016, **52**, 9757–9760.
- S16 M. Sevilla, P. Valle-Vigón and A. B. Fuertes, *Adv. Funct. Mater.*, 2011, **21**, 2781–2787.
- S17 Y. Zhao, L. Zhao, K.X. Yao, Y. Yang, Q. Zhang and Y. Han, *J. Mater. Chem.*, 2012, **22**, 19726–19731
- S18 B. Ashourirad, P. Arab, T. Islamoglu, K. A. Cychosz, M. Thommes and H. M. El-Kaderi, *J. Mater. Chem. A.*, 2016, **4**, 14693–14702
- S19 J.H. Lee, H.J. Lee, S.Y. Lim, B.G. Kim and J.W. Choi, *J. Am. Chem. Soc.*, 2015, **137**, 7210–7216.
- S20 X. Ma, L. Li, R. Chen, C. Wang, H. Li and H. Li, *Chem. Asian J.*, 2018, **13**, 2069–2076.
- S21 D. Tiwari, H. Bhunia and P.K. Bajpai, *J. CO2 Util.*, 2017, **21**, 302–313.
- S22 D. Tiwari, H. Bhunia and P. K. Bajpai, *Appl. Surf. Sci.*, 2018, **439**, 760–771.
- S23 Q. Cen, M. Fang, T. Wang, I. Majchrzak-Kucęba, D. Wawrzyńczak and Z. Luo, *Greenhouse Gases Sci. Technol.*, 2016, **6**, 787–796
- S24 Y. Li, D. Li, Y. Rao, X. Zhao and M. Wu, *Carbon*, 2016, **105**, 454–462.
- S25 B. Wang, Z. Zhang, C. Zhu, L. Zhang, N. Sun, W. Wei and Y. Sun, *RSC Adv.*, 2016, **6**, 33580–33588
- S26 M.D. Hornbostel, J. Bao, G. Krishnan, A. Nagar, I. Jayaweera, T. Kobayashi, A. Sanjurjo, J. Sweeney, D. Carruthers, M.A. Petruska and L. Dubois, *Carbon*, 2013, **56**, 77–85.
- S27 Y. Li, X. Wang and M. Cao, *J. CO2 Util.*, 2018, **27**, 204–216
- S28 M.S. Lee, M. Park, H.Y. Kim and S.J. Park, *Sci. Rep.*, 2016, **6**, 23224–23234.
- S29 B. Ashourirad, A. K. Sekizkardes, S. Altarawneh and H. M. El-Kaderi, *Chem. Mater.*, 2015, **27**, 1349–1358
- S30 J. Wei, D. Zhou, Z. Sun, Y. Deng, Y. Xia and D. Zhao, *Adv. Funct. Mater.* 2013, **23**, 2322–2328.
- S31 C. Pevida, T.C. Drage and C.E. Snape, *Carbon*, 2008, **46**, 1464–1474.
- S32 M.G. Plaza, C. Pevida, B. Arias, J. Feroso, M.D. Casal, C.F. Martín, F. Rubiera and J.J. Pis, *Fuel*, 2009, **88**, 2442–2447.
- S33 M. Nováček, O. Jankovský, J. Luxa, D. Sedmidubský, M. Pumera, V. Fila, M. Lhotka, K. Klímová, S. Matějková and Z. Sofer, *J. Mater. Chem. A*, 2017, **5**, 2739–2748.
- S34 M. Seredych, E. Rodriguez-Castellon and T.J. Badosz, *Carbon*, 2016, **107**, 501–509.
- S35 S. Chowdhury and R. Balasubramanian, *Ind. Eng. Chem. Res.*, 2016, **55**, 7906–7916
- S36 S. Chowdhury and R. Balasubramanian, *J. CO2 Util.*, 2016, **13**, 50–60.
- S37 Arami-Niya, T.E. Rufford and Z. Zhu, *Carbon*, 2016, 103, 115–124
- S38 M.E. Casco, M. Martinez-Escandell, J. Silvestre-Albero and F. Rodriguez-Reinoso, *Carbon*, 2014, **67**, 230–235.
- S39 Y. Boyjoo, Y. Cheng, H. Zhong, H. Tian, J. Pan, V.K. Pareek, J.F. Lamonier, M. Jaroniec and J. Liu, *Carbon*, 2017, **116**, 490–499
- S40 D.K. Singh, K.S. Krishna, S. Harish, S. Sampath and M. Eswaramoorthy, *Angew. Chem. Int. Ed.*, 2016, **55**, 2032–2036.
- S41 K.M. Nelson, S.M. Mahurin, R.T. Mayes, B. Williamson, C.M. Teague, A.J. Binder, L. Baggetto, G.M. Veith and S. Dai, *Microporous Mesoporous Mater.*, 2016, **222**, 94–103.
- S42 R. Wang, P. Wang, X. Yan, J. Lang, C. Peng and Q. Xue, *ACS Appl. Mater. Interfaces*, 2012, **4**, 5800–5806
- S43 D. Saha, G. Orkoulas, J. Chen and D.K. Hensley, *Microporous Mesoporous Mater.*, 2017, **241**, 226–237.
- S44 J. Marszewska and M. Jaroniec, *J. Colloid Interface Sci.*, 2017, **487**, 162–174.
- S45 S. Gu, J. He, Y. Zhu, Z. Wang, D. Chen, G. Yu, C. Pan, J. Guan and K. Tao, *ACS Appl. Mater. Interfaces*, 2016, **8**, 18383–18392.
- S46 M. Ding and H.L. Jiang, *Chem. Commun.*, 2016, **52**, 12294–12297.

- S47 B. Wang, C. Zhu, Z. Zhang, W. Zhang, X. Chen, N. Sun, W. Wei, Y. Sun and H. Ji, *Fuel*, 2016, **179**, 274–280.
- S48 H. Seema, K.C. Kemp, N.H. Le, S.W. Park, V. Chandra, J.W. Lee and K.S. Kim, *Carbon*, 2014, **66**, 320–326.
- S49 S.M. Mahurin, J. Górka, K.M. Nelson, R.T. Mayes and S. Dai, *Carbon*, 2014, **67**, 457–464.
- S50 Y. Jin, S.C. Hawkins, C.P. Huynh and S. Su, *Energy Environ. Sci.*, 2013, **6**, 2591–2596.
- S51 W. Tian, H. Zhang, H. Sun, A. Suvorova, M. Saunders, M. Tade and S. Wang, *Adv. Funct. Mater.*, 2016, **26**, 8651–8661.
- S52 F. Liu, K. Huang, S. Ding and S. Dai, *J. Mater. Chem. A* **4**, 2016, 14567–14571.
- S53 L. Guo, J. Yang, G. Hu, X. Hu, L. Wang, Y. Dong, H. DaCosta and M. Fan, *ACS Sustainable Chem. Eng.*, 2016, **4**, 2806–2813.
- S54 B. Adeniran, E. Masika and R. Mokaya, *J. Mater. Chem. A*, 2014, **2**, 14696–14710
- S55 H. M. Coromina, D. A. Walsh and R. Mokaya, *J. Mater. Chem. A*, 2016, **4**, 280–289.
- S56 H. Wei, S. Deng, B. Hu, Z. Chen, B. Wang, J. Huang and G. Yu, *ChemSusChem*, 2012, **5**, 2354–2360
- S57 N.P. Wickramaratne and M. Jaroniec, *J. Mater. Chem. A*, 2013, **1**, 112–116.
- S58 W. Travis, S. Gadipelli and Z. Guo, *RSC Adv.*, 2015, **5**, 29558–29562.
- S59 J. Zhou, Z. Li, W. Xing, H. Shen, X. Bi, T. Zhu, Z. Qiu and S. Zhuo, *Adv. Funct. Mater.*, 2016, **26**, 7955–7964.
- S60 V. Gargiulo, A. Gomis-Berenguer, P. Giudicianni, C.O. Ania, R. Ragucci and M. Alfè, *Energy Fuels*, 2018, **32**, 10218–10227.
- S61 B. Chang, L. Sun, W. Shi, S. Zhang and B. Yang, *ACS Omega*, 2018, **3**, 5563–5573.
- S62 E.J. Wang, Z.Y. Sui, Y.N. Sun, Z. Ma and B.H. Han, *Langmuir*, 2018, **34**, 6358–6366
- S63 L. Estevez, D. Barpaga, J. Zheng, S. Sabale, R.L. Patel, J.G. Zhang, B.P. McGrail and R.K. Motkuri, *Ind. Eng. Chem. Res.*, 2018, **57**, 1262–1268.
- S64 X. X. Wu, C. Y. Zhang, Z. W. Tian and J. J. Cai, *New Carbon Mater.*, 2018, **33**(3), 252–261.
- S65 Z. Liu, Z. Zhang, Z. Jia, L. Zhao, T. Zhang, W. Xing, S. Komarneni, F. Subhan and Z. Yan, *Chem. Eng. J.*, 2018, **337**, 290–299.
- S66 H. Zhao, L. Shi, Z. Zhang, X. Luo, L. Zhang, Q. Shen, S. Li, H. Zhang, N. Sun, W. Wei and Y. Sun, *ACS Appl. Mater. Interfaces*, 2018, **10**, 3495–3505.
- S67 N. Querejeta, M. V. Gil, C. Pevida and T. A. Centeno, *J. CO2 Util.*, 2018, **26**, 1–7.
- S68 D. Zabiegaj, M. Caccia, M.E. Casco, F. Ravera and J. Narciso, *J. CO2 Util.*, 2018, **26**, 36–44.
- S69 C. Chen, H. Huang, Y. Yu, J. Shi, C. He, R. Albilali and H. Pan, *Chem. Eng. J.*, 2018, **353**, 584–594.
- S70 J. J. Manyà, B. González, M. Azuara and G. Arner, *Chem. Eng. J.*, 2018, **345**, 631–639.
- S71 M. Yang, L. Guo, G. Hu, X. Hu, L. Xu, J. Chen, W. Dai and M. Fan, *Environ. Sci. Technol.*, 2015, **49**, 7063–7070.
- S72 W. Xing, C. Liu, Z. Zhou, L. Zhang, J. Zhou, S. Zhuo, Z. Yan, H. Gao, G. Wang and S.Z. Qiao, *Energy Environ. Sci.*, 2012, **5**, 7323–7327.
- S73 B. Zhu, C. Shang and Z. Guo, *ACS Sustainable Chem. Eng.*, 2016, **4**, 1050–1057.
- S74 J. Chen, J. Yang, G. Hu, X. Hu, Z. Li, S. Shen, M. Radosz and M. Fan, *ACS Sustain. Chem. Eng.*, 2016, **4**, 1439–1445.
- S75 X. Ma, L. Li, R. Chen, C. Wang, H. Li and S. Wang, *Appl. Surf. Sci.*, 2018, **435**, 494–502.
- S76 J. Liu, X. Liu, Y. Sun, C. Sun, H. Liu, L.A. Stevens, K. Li and C.E. Snape, *Adv. Sustain. Syst.*, 2018, **2**, 1700115.
- S77 L. Liang, M. Zhou, C. Tan, X. Tian and K. Li, *Microporous Mesoporous Mater.*, 2018, **271**, 92–99.
- S78 N. P. Wickramaratne and M. Jaroniec, *ACS Appl. Mater. Interfaces*, 2013, **5**, 1849–1855.
- S79 L. Liu, Q. Deng, X. Hou and Z. Yuan *J. Mater. Chem.*, 2012, **22**, 15540–15548.
- S80 T. Liang, C. Chen, X. Li and J. Zhang, *Langmuir*, 2016, **32**, 8042–8049.
- S81 R. Bai, M. Yang, G. Hu, L. Xu, X. Hu, Z. Li, S. Wang, W. Dai and M. Fan, *Carbon*, 2015, **81**, 465–473
- S82 A. Alabadi, H. A. Abbood, Q. Li, N. Jing and B. Tan, *Sci. Rep.*, 2016, **6**, 38614–38622
- S83 G.P. Hao, W.C. Li, D. Qian and A.H. Lu, *Adv. Mater.*, 2010, **22**, 853–857.
- S84 G.P. Hao, W.C. Li, D. Qian, G.H. Wang, W.P. Zhang, T. Zhang, A.Q. Wang, F. Schüth, H.J. Bongard and A.H. Lu, *J. Am. Chem. Soc.*, 2011, **133**, 11378–11388.

- S85 T.J. Bandoz, M. Seredych, E. Rodríguez-Castellón, Y. Cheng, L.L. Daemen and A.J. Ramírez-Cuesta, *Carbon*, 2016, **96**, 856–863
- S86 Q. Wu, W. Li, S. Liu and C. Jin, *Appl. Surf. Sci.*, 2016, **369**, 101-107.
- S87 A., Rehman and S. J. Park, *Chem. Eng. J.*, 2018, **352**, 539-548.
- S88 L. Yue, L. Rao, L. Wang, Y. Sun, Z. Wu, H. DaCosta and X. Hu, *Energy Fuels*, 2018, **32**, 2081-2088
- S89 H. Wang, Z. Cheng, Y. Liao, J. Li, J. Weber, A. Thomas and C.F. Faul, *Chem. Mater.*, 2017, **29**, 4885–4893.
- S90 A. Alabadi, S. Razzaque and Y. Yang, S. Chen, B Tan, *Chem. Eng. J.*, 2015, **281**, 606-612.
- S91 J. Fujiki and K. Yogo, *Chem. Commun.*, 2016, **52**, 186-189.
- S92 Y. Wu, Z. Chen, Y. Liu, Y. Xu and Z. Liu, *Fuel*, 2018, **233**, 574-581
- S93 J. Kou and L.B. Sun, *Ind. Eng. Chem. Res.*, 2016, **55**, 10916–10925.
- S94 N.P. Wickramaratne, J. Xu, M. Wang, L. Zhu, L. Dai and M. Jaroniec, *Chem. Mater.*, 2014, **26**, 2820–2828.
- S95 J. Zhou, Z. Li, W. Xing, T. Zhu, H. Shen and S. Zhuo, *Chem. Commun.*, 2015, **51**, 4591-4594.
- S96 J. Song, W. Shen, J. Wang and W. Fan, *Carbon*, 2014, **69**, 255-263.
- S97 A. Arami-Niya, T.E. Rufford and Z. Zhu, *Energy Fuels* **30**, 2016, 7298–7309
- S98 S.E Bae, K.J. Kim, I.H. Choi and S Huh, *Carbon*, 2016, **99**, 8–16
- S99 X. Ma, M. Cao and C. Hu, *J. Mater. Chem. A.*, 2013, **1**, 913-918.
- S100 Z. Tian, J. Huang, X. Zhang, G. Shao, Q. He, S. Cao and S. Yuan, *Microporous Mesoporous Mater.*, 2018, **257**, 19-26.
- S101 Y. Xia, R. Mokaya, G. S. Walker and Y. Zhu. *Adv. Energy. Mater.* 2011, **1**, 678-683.
- S102 V. Chandra, S.U. Yu, S.H. Kim, Y.S. Yoon, D.Y. Kim, A.H. Kwon, M. Meyyappan and K.S. Kim, *Chem. Commun.* 2012, **48**, 735-737.
- S103 H. Wei, J. Chen, N. Fu, H. Chen, H. Lin and S. Han, *Electrochimica Acta*, 2018, **266**, 161-169.
- S104 J. Wang, I. Senkovska, M. Oschatz, M.R. Lohe, L. Borchardt, A. Heerwig, Q. Liu and S. Kaskel, *J. Mater. Chem. A*, 2013, **1**, 10951–10961.
- S105 L. Wan, J. Wang, C. Feng, Y. Sun and K. Li, *Nanoscale*, 2015, **7**, 6534-6544.
- S106 L. Wang, L. Rao, B. Xia, L. Wang, L. Yue, Y. Liang, H. DaCosta and X. Hu, *Carbon*, 2018, **130**, 31-40.
- S107 J.Y. Wu, M.G. Mohamed and S.W. Kuo, *Polym. Chem.*, 2017, **8**, 5481-5489.
- S108 B. Adeniran and R. Mokaya, *Chem. Mater.*, 2016, **28**, 994-1001
- S109 L.P. Guo, Q.T. Hu, P. Zhang, W.C. Li and A.H. Lu, *Chem. Eur. J.*, 2018, **24**, 8369-8374.
- S110 W. Cai, S. Zhang, X. Hu and Jaroniec, M. *Energy Fuels*, 2018, **32**, 9701-9710.
- S111 D. Li, J. Zhou, Z. Zhang, L. Li, Y. Tian, Y. Lu, Y. Qiao, J. Li and L. Wen, *Carbon*, 2017, **114**, 496–503
- S112 X. Ren, H. Li, J. Chen, L. Wei, A. Modak, H. Yang and Q. Yang, *Carbon*, 2017, **114**, 473–481.
- S113 C. Ge, J. Song, Z. Qin, J. Wang and W. Fan, *ACS Appl. Mater. Interfaces*, 2016, **8**, 18849–18859
- S114 L. Wang and R. T. Yang, *J. Phys. Chem. C.*, 2011, **116**, 1099-1106.
- S115 D. Saha, S.E. Van Bramer, G. Orkoulas, H.C. Ho, J. Chen and D.K. Henley, *Carbon*, 2017, **121**, 257–266.
- S116 C. Zhang, W. Song, Q. Ma, L. Xie, X. Zhang and H. Guo, *Energy Fuels*, 2016, **30**, 4181-4190.
- S117 D. Yu, J. Hu, L. Zhou, J. Li, J. Tang, C. Peng and H. Liu, *Energy Fuels*, 2018, **32**, 3726-3732.
- S118 F. Jiang, T. Jin, X. Zhu, Z. Tian, C.L. Do-Thanh, J. Hu, D.E. Jiang, H. Wang, H. Liu and S. Dai, *Macromolecules*, 2016, **49**, 5325–5330.
- S119 D.L. Sivasdas, S. Vijayan, R. Rajeev, K.N. Ninan and K. Prabhakaran, *Carbon*, 2016, **109**, 7-18.
- S120 X. Cui, Q. Yang, Y. Xiong, Z. Bao, H. Xing and S. Dai, *Chem. Commun.*, 2017, **53**, 4915–4918.
- S121 W. Tian, H. Zhang, H. Sun, M.O. Tadé and S. Wang, *Chem. Eng. J.*, 2018, **347**, 432-439.
- S122 A. Gao, N. Guo, M. Yan, M. Li, F. Wang and R. Yang, *Microporous Mesoporous Mater.*, 2018, **260**, 172-179.
- S123 Y. Zhao, X. Liu, K.X. Yao, L. Zhao and Y. Han, *Chem. Mater.*, 2012, **24**, 4725-4734 (2012)
- S124 Z. Geng, Q. Xiao, H. Lv, B. Li, H. Wu, Y. Lu and C. Zhang, *Sci. Rep.*, 2016, **6**, 30049–30056.

- S125 Z. Zhang, B. Wang, C. Zhu, P. Gao, Z. Tang, N. Sun, W. Wei and Y. Sun, *J. Mater. Chem. A*, 2015, **3**, 23990–23999.
- S126 L. Yue, L. Rao, L. Wang, L. An, C. Hou, C. Ma, H. DaCosta and X. Hu, *Energy Fuels*, 2018, **32**, 6955-6963.
- S127 C. Goel, H. Kaur, H. Bhunia and P.K. Bajpai, *J. CO2 Util.*, 2016, **16**, 50–63.
- S128 O. Boujibar, A. Souikny, F. Ghamouss, O. Achak, M. Dahbi and T. Chafik, *J. Environ. Chem. Eng.*, 2018, **6**, 1995-2002
- S129 C. Goel, H. Bhunia and P.K. Bajpai, *J. Environ. Chem. Eng.*, 2016, 4, 346–356.
- S130 Y. H. Abdelmoaty, T. D. Tessema, N. Norouzi, O. M. El-Kadri, J. B. M. Turner and H. M. El-Kaderi, *ACS Appl. Mater. Interfaces*, 2017, **9**, 35802–35810
- S131 L. Li, X.F. Wang, J.J. Zhong, X. Qian, S.L. Song, Y.G. Zhang and D.H. Li, *Ind. Eng. Chem. Res.*, 2018, **57**, 11608-11616.
- S132 Y. Wu, J. Wang, Y. Muhammad, S. Subhan, Y. Zhang, Y. Ling, J. Li, Z. Zhao and Z. Zhao, *Chem. Eng. J.*, 2018, **349**, 92-100.
- S133 G. Sethia and A. Sayari, *Carbon*, 2015, **93**, 68-80.
- S134 C. Chen, J. Kim and W. S. Ahn, Efficient carbon dioxide capture over a nitrogen-rich carbon having a hierarchical micro-mesopore structure. *Fuel*, 2012, **95**, 360-364.
- S135 S. Gadipelli and Z. X. Guo, *ChemSusChem*, 2015, **8**, 2123-2132.
